# Supplementary material for: A strontium isoscape of southwestern Australia and progress toward a national strontium isoscape
Source: Copernicus journal article supplement (doi:10.5194/essd-17-79-2025), 2025-01-16
Supplement: Supplementary file 1 [file essd-17-79-2025-supplement.pdf]

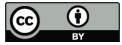

*Supplement of*

## **A strontium isoscape of southwestern Australia and progress toward a national strontium isoscape**

**Patrice de Caritat et al.**

*Correspondence to:* Patrice de Caritat ([patrice.decaritat@curtin.edu.au](mailto:patrice.decaritat@curtin.edu.au))

The copyright of individual parts of the supplement might differ from the article licence.



b)

## Strontium Isoscape of Southwestern Australia

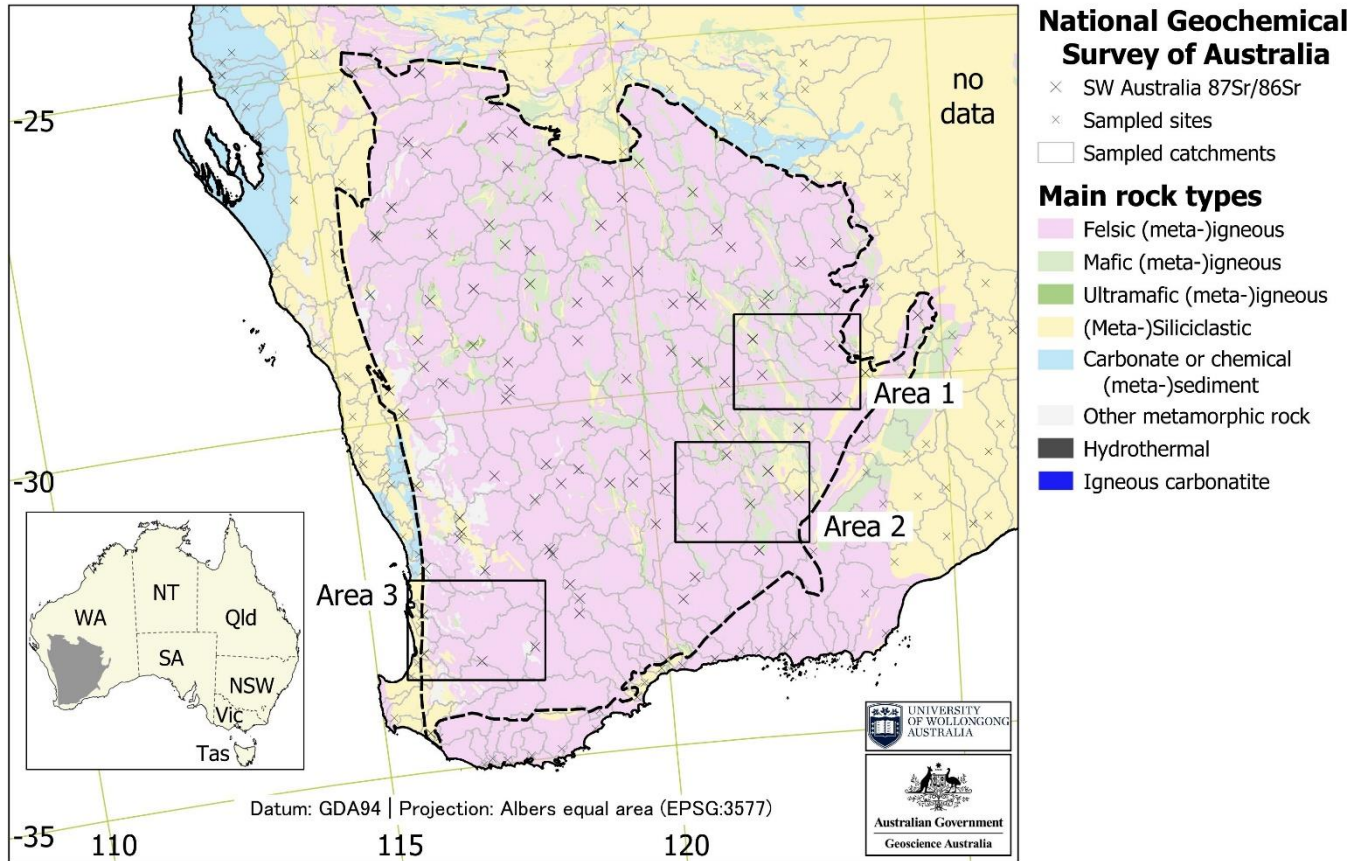

Figure S1. (a) Area 1 detail of the southwestern Australia Sr isotope study showing results from the present NGSa catchment sediment  $^{87}\text{Sr}/^{86}\text{Sr}$  analysis (as coloured circles with values in black typeface) as well as  $^{87}\text{Sr}/^{86}\text{Sr}$  values from the literature (as coloured stars with values in blue typeface; McCulloch et al., 1983) overlain on simplified main rock types (Cutten and Riganti, 2020). Coloured symbols represent  $^{87}\text{Sr}/^{86}\text{Sr}$  values, as per inset legend. (b) Location map of Areas 1, 2, and 3 within the Yilgarn geological region overlain on simplified main rock types (Cutten and Riganti, 2020) coloured as per legend. Catchment boundaries are outlined in grey. The Yilgarn geological region is outlined in a stippled line.

15

## 2 Area 2 validation

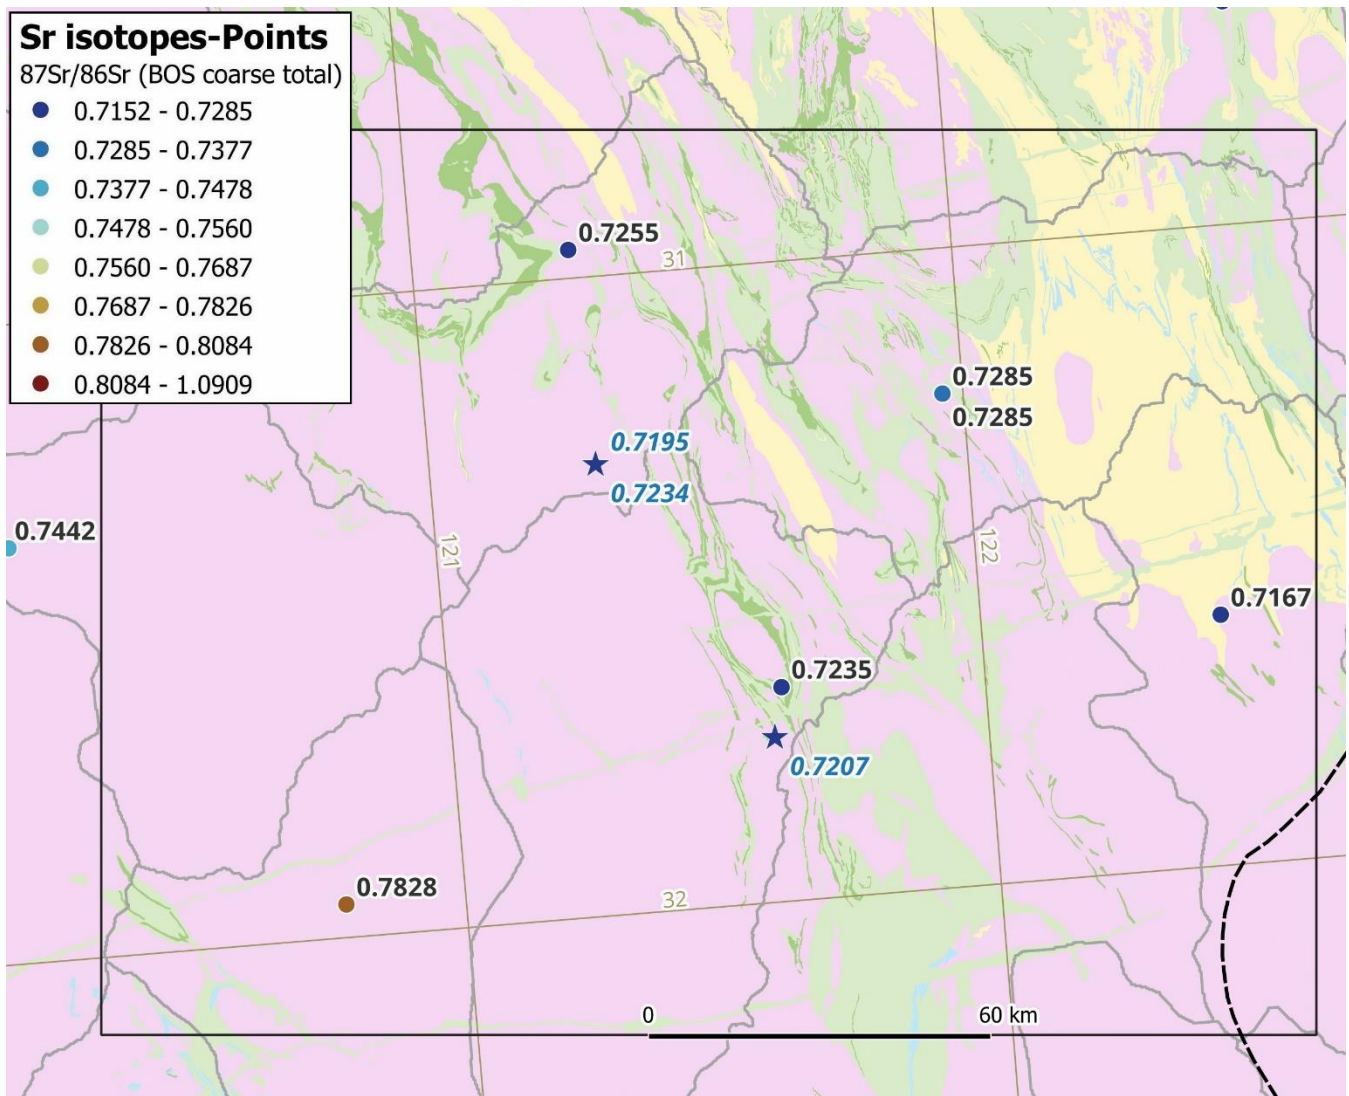

20

Figure S2. Area 2 detail of the southwestern Australia Sr isotope study showing results from the present NGSa catchment sediment  $^{87}\text{Sr}/^{86}\text{Sr}$  analysis (as coloured circles with values in black typeface) as well as  $^{87}\text{Sr}/^{86}\text{Sr}$  values from the literature (as coloured stars with values in blue typeface; McCulloch et al., 1983) overlain on simplified main rock types (Cutten and Riganti, 2020). Coloured symbols represent  $^{87}\text{Sr}/^{86}\text{Sr}$  values, as per inset legend. Catchment boundaries are outlined in grey. Refer to Figures S1b for location within the Yilgarn geological region and main rock types legend.

25



### 3 Area 3 validation

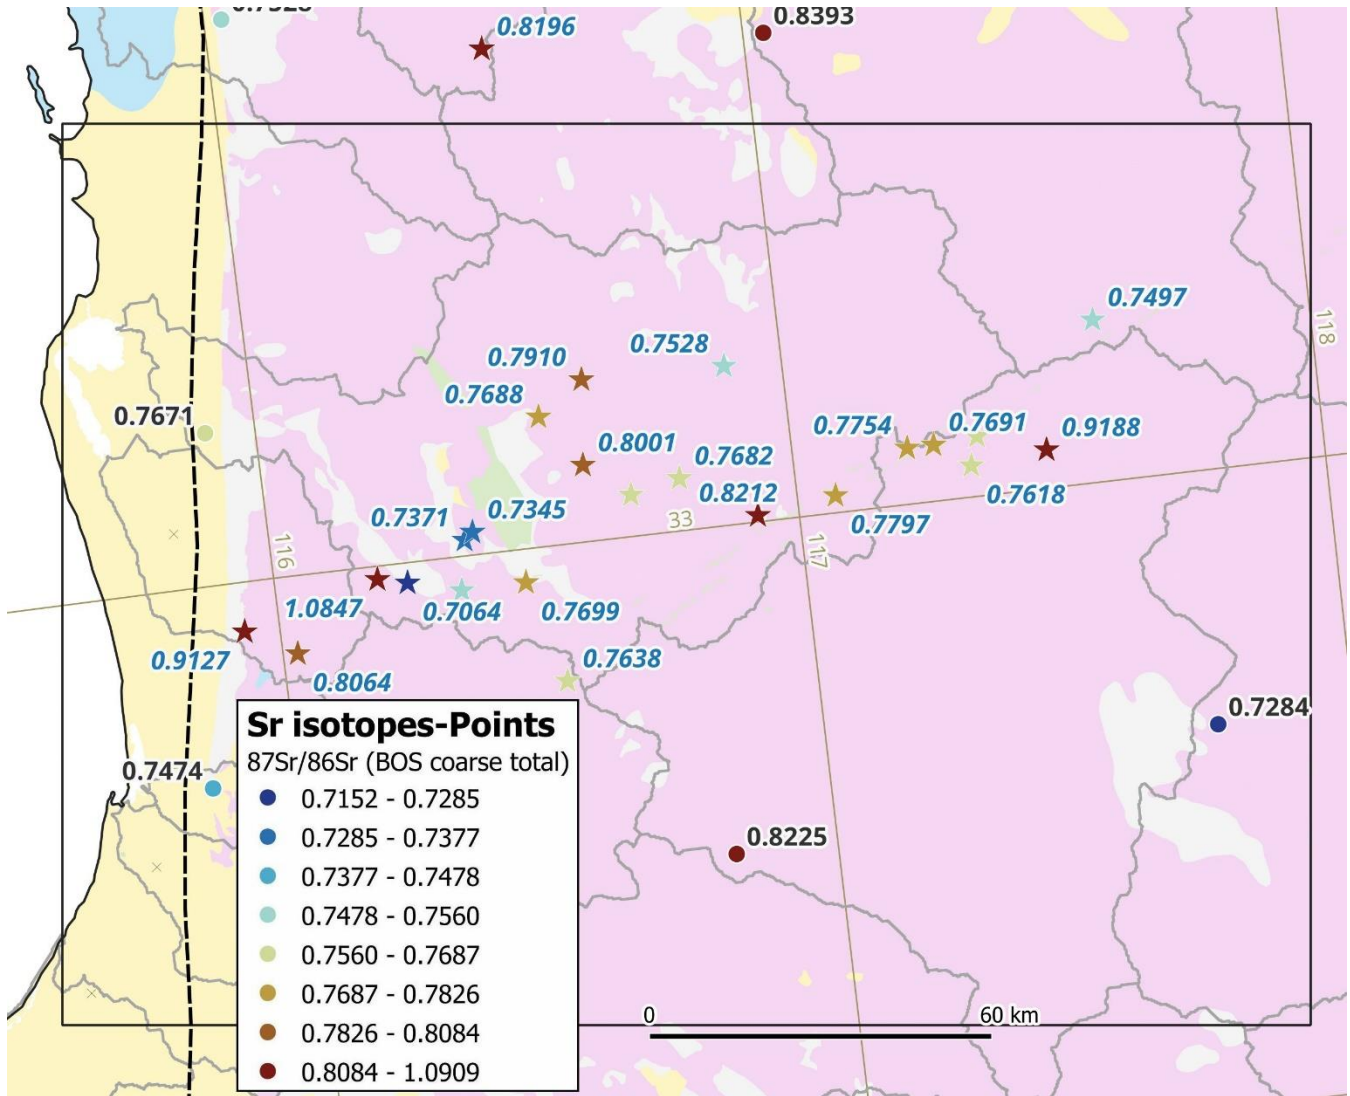

30 Figure S3. Area 3 detail of the southwestern Australia Sr isotope study showing results from the present NGSa catchment sediment  $^{87}\text{Sr}/^{86}\text{Sr}$  analysis (as coloured circles with values in black typeface) as well as  $^{87}\text{Sr}/^{86}\text{Sr}$  values from the literature (as coloured stars with values in blue typeface; De Laeter and Libby, 1993) overlain on simplified main rock types (Cutten and Riganti, 2020). Coloured symbols represent  $^{87}\text{Sr}/^{86}\text{Sr}$  values, as per inset legend. Catchment boundaries are outlined in grey. Refer to Figures S1b for location within the Yilgarn geological region and main rock types legend.

4 Mineral resources

a)

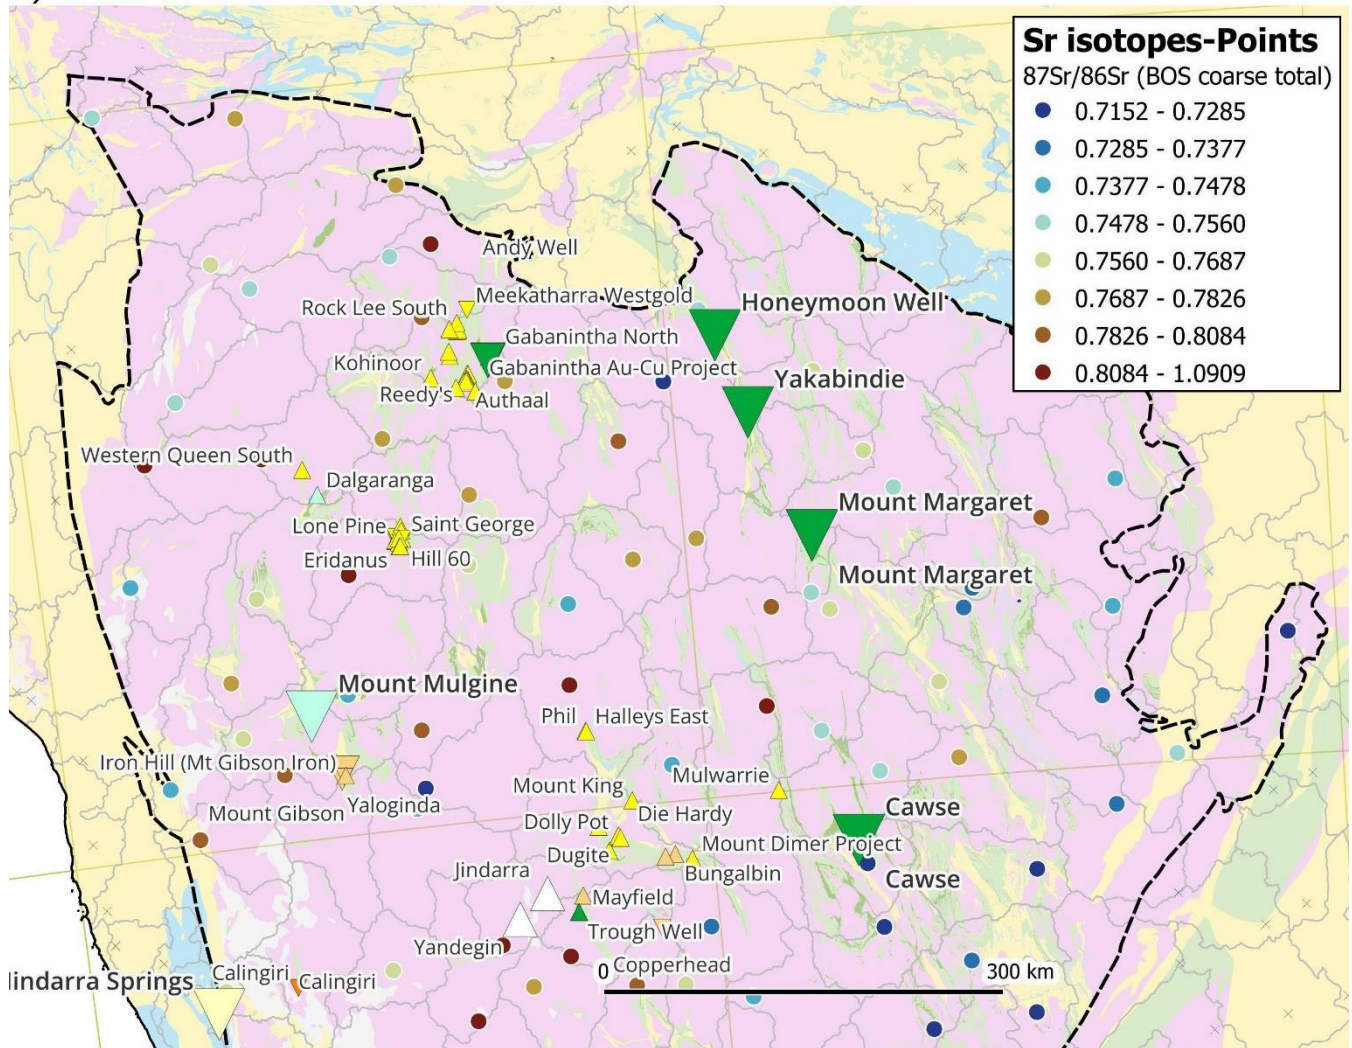



b)

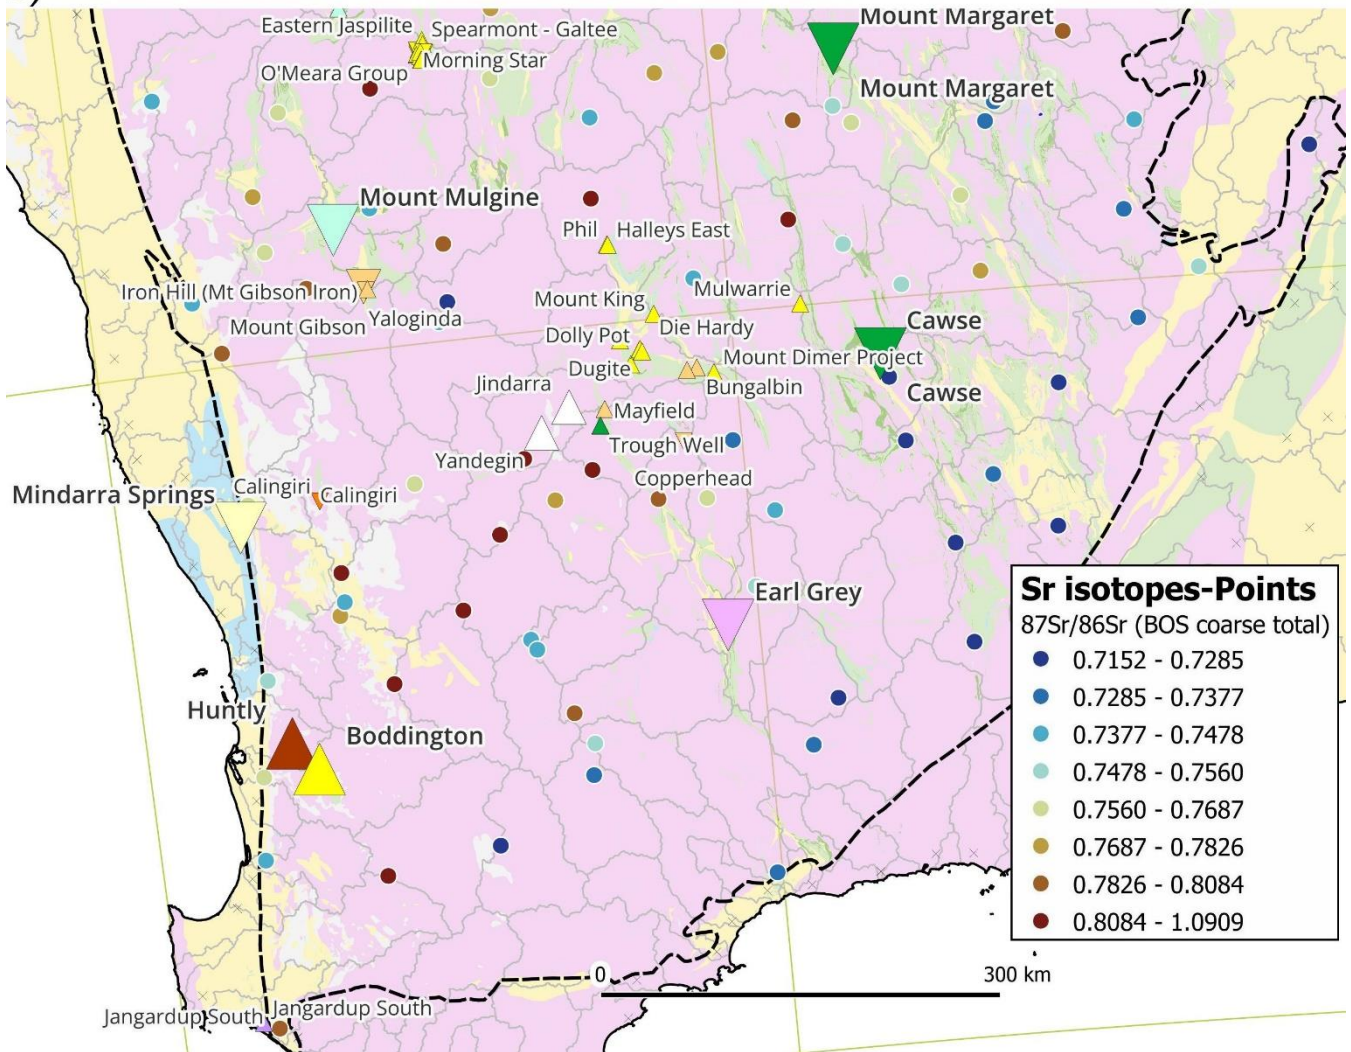

c)

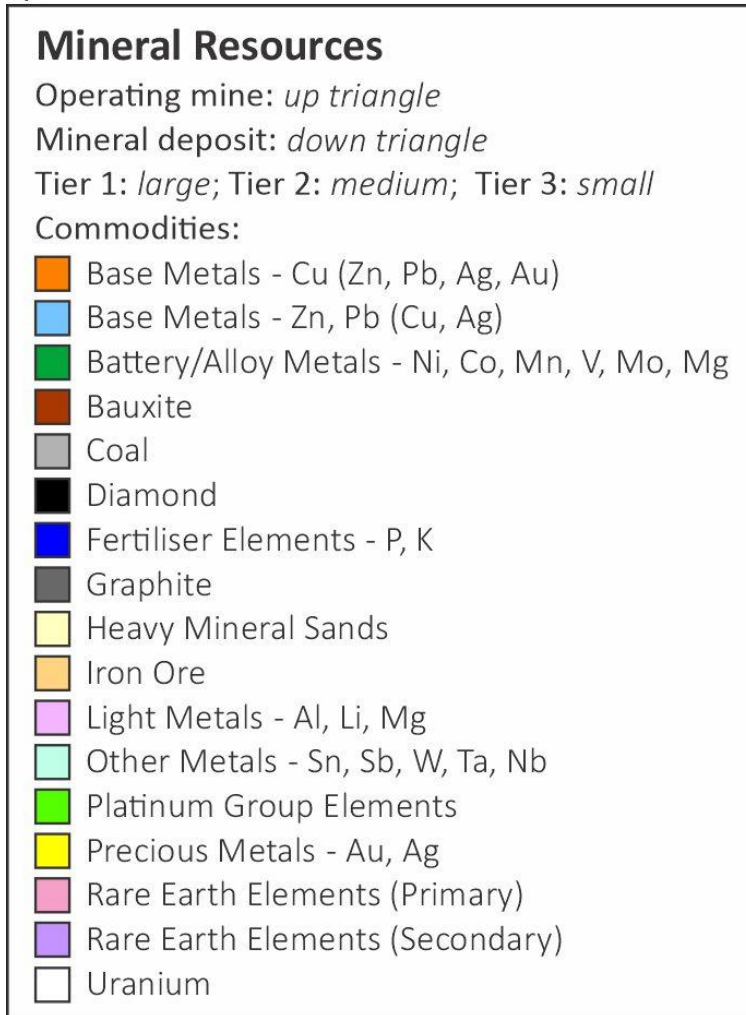

Figure S4. Map showing the location of selected mineral resources (triangles) in the northern Yilgarn (a), and southern Yilgarn geological region (b), from Senior et al. (2021). Mineral occurrences in catchments with a  $^{87}\text{Sr}/^{86}\text{Sr}$  value (circles) greater than 0.8 are shown and labelled, as are 'Tier 1' mineral resources in the region. All mineral occurrences are shown in Figure 2 (Main paper). Key to mineral resource symbols detailed in (c). Catchment boundaries are outlined in grey. The Yilgarn geological region is outlined in a stippled line.

40



## References

- Cutten, H. N., and Riganti, A., (compilers): 1:500 000 State Interpreted Bedrock Geology of Western Australia, Geological Survey of Western Australia, <https://dasc.dmirs.wa.gov.au/>, 2020.
- 45 De Laeter, J. R., and Libby, W. G.: Early Palaeozoic biotite Rb-Sr dates in the Yilgarn Craton near Harvey, Western Australia, *Aus. J. Earth Sci.*, 40, 445–453, <https://doi.org/10.1080/08120099308728095>, 1993.
- McCulloch, M. T., Compston, W., and Froude, D.: Sm-Nd and Rb-Sr dating of Archaean gneisses, eastern Yilgarn Block, Western Australia, *J. Geol. Soc. Aus.*, 30, 149–153, <https://doi.org/10.1080/00167618308729242>, 1983.
- 50 Senior, A., Britt, A., Summerfield, D., Hughes, A., Hitchman, A., Cross, A., Champion, D., Huston, D., Bastrakov, E., Sexton, M., Moloney, J., Pheeney, J., Teh M., and Schofield, A.: Australia's Identified Mineral Resources 2020. Geoscience Australia, Canberra, <http://dx.doi.org/10.11636/1327-1466.2020>, 2021.
